# Supplementary material for: Ketamine and Other NMDA Antagonists: Early Clinical Trials and Possible Mechanisms in Depression
Source: Atypon-hosted journal article supplement (doi:10.1176/appi.ajp.2015.15040465), 2015-10-01

**Online Supplemental Table 1 – Representative List of NMDA Receptor Antagonists**

| Competitive Inhibition        |                                   | Non-Competitive Inhibition      |                      |                      |                     |
|-------------------------------|-----------------------------------|---------------------------------|----------------------|----------------------|---------------------|
| Glutamate Receptor Antagonist | Glycine Receptor Antagonist       | Antagonists at Allosteric Sites | Ion Channel Blockers |                      |                     |
| AP5 <sup>1</sup>              | D-Cycloserine <sup>3</sup>        | Dexanabinol (HU-211)            | Amantadine           | Ethanol              | Magnesium           |
| AP7 <sup>2</sup>              | Rapastinel (GLYX-13) <sup>3</sup> | EVT101                          | Atomoxetine          | Gacyclidine          | Memantine           |
| Midafotel (CPPene)            | Lacosamide                        | Ifenprodil                      | Chloroform           | Ibogaine             | Methoxetamine       |
| Selfotel (CGS-19755)          | L-Phenylalanine                   | Ketamine <sup>4</sup>           | Dextromethorphan     | Ketamine             | Nitrous Oxide       |
|                               |                                   | MK-0657 (CERC 301)              | Dextrorphan          | Lanicemine (AZD6765) | Phencyclidine (PCP) |
|                               |                                   | Traxoprodil (CP-101,606)        | Dizocilpine (MK-801) |                      | Rolicyclidine       |

<sup>1</sup>AP5= amino-5-phosphonovaleric acid <sup>2</sup>AP7=2-amino-7-phosphonoheptanoic acid <sup>3</sup>Partial agonist at glycine receptor. <sup>4</sup>One study (174) suggests ketamine may antagonize NMDA receptor activity by binding at an allosteric site in addition to blocking the receptor ion channel.

Online Supplemental Table 2 Characteristics of Included Randomized Clinical Trials of Other NMDA Antagonists

| Source                            | Design     | Active Regimen            | Control Regimen | Concomitant Therapy | Diagnoses | Sample Size | Depression Scale   |
|-----------------------------------|------------|---------------------------|-----------------|---------------------|-----------|-------------|--------------------|
| <b>D-Cycloserine</b>              |            |                           |                 |                     |           |             |                    |
| Heresco-Levy et al (111)          | Cross Over | 250 mg/day                | Placebo         | Various             | MDD       | 22          | HRSD <sub>21</sub> |
| Heresco-Levy et al (112)          | Parallel   | 1000 mg/day               | Placebo         | Various             | MDD       | 26          | HRSD <sub>21</sub> |
| <b>Rapastinel (GLYX-13)</b>       |            |                           |                 |                     |           |             |                    |
| Preskorn et al (116) <sup>1</sup> | Parallel   | 1 mg/kg IV x 1            | Placebo         | None                | MDD       | 58          | HRSD <sub>17</sub> |
| Preskorn et al (116) <sup>1</sup> | Parallel   | 5 mg/kg IV x 1            | Placebo         | None                | MDD       | 53          | HRSD <sub>17</sub> |
| Preskorn et al (116) <sup>1</sup> | Parallel   | 10 mg/kg IV x 1           | Placebo         | None                | MDD       | 50          | HRSD <sub>17</sub> |
| Preskorn et al (116) <sup>1</sup> | Parallel   | 30 mg/kg IV x 1           | Placebo         | None                | MDD       | 54          | HRSD <sub>17</sub> |
| <b>Lanicemine (AZD6765)</b>       |            |                           |                 |                     |           |             |                    |
| Sanacora et al (102)              | Parallel   | 100mg IV x 1              | Placebo         | Various             | MDD       | 34          | MADRS              |
| Sanacora et al (102)              | Parallel   | 100mg IV x 9 <sup>2</sup> | Placebo         | Various             | MDD       | 101         | MADRS              |
| Sanacora et al (102)              | Parallel   | 150mg IV x 9 <sup>2</sup> | Placebo         | Various             | MDD       | 101         | MADRS              |
| Zarate et al (101)                | Cross Over | 150mg IV x 1              | Placebo         | None                | MDD       | 22          | MADRS              |
| <b>Memantine</b>                  |            |                           |                 |                     |           |             |                    |
| Anand et al (100)                 | Parallel   | 20 mg/day                 | Placebo         | Lamotrigine         | BD        | 29          | HRSD <sub>17</sub> |
| Smith et al (99)                  | Parallel   | 20 mg/day                 | Placebo         | Various             | MDD       | 31          | MADRS              |
| Zarate et al (98)                 | Parallel   | 5-20 mg/day               | Placebo         | None                | MDD       | 32          | MADRS              |

| MK-0657 (CERC-301)       |            |                        |         |            |     |    |                    |
|--------------------------|------------|------------------------|---------|------------|-----|----|--------------------|
| Ibrahim et al (105)      | Cross Over | 4-8 mg/day x 12 days   | Placebo | None       | MDD | 5  | MADRS              |
| Nitrous Oxide            |            |                        |         |            |     |    |                    |
| Nagele et al (103)       | Cross Over | 50% Inhalation x 1 Hr. | Placebo | Various    | MDD | 20 | HRSD <sub>21</sub> |
| Traxoprodil (CP-101,606) |            |                        |         |            |     |    |                    |
| Preskorn et al (104)     | Parallel   | 0.75 mg/kg             | Placebo | Paroxetine | MDD | 30 | MADRS              |

**Abbreviations:** BD=Bipolar Disorder HRSD=Hamilton Rating Scale for Depression (Numerical subscript following HRSD indicates number of items used. If blank, the item count was not reported.) IV=Intravenous MDD=Major Depressive Disorder MADRS=Montgomery-Åsberg Depression Rating Scale

**Notes:** <sup>1</sup>Partial trial results were previously published by Moskal et al (117). <sup>2</sup>Lanicemine was infused 3 times per week over a 3 week period.

**Online Supplemental Table 3 –Comparison of Ketamine and Memantine NMDA Receptor Activity**

| Test                                           | Ketamine     |                                                                                               | Memantine                     |                                                                                                      |
|------------------------------------------------|--------------|-----------------------------------------------------------------------------------------------|-------------------------------|------------------------------------------------------------------------------------------------------|
|                                                | Finding      | Sources                                                                                       | Finding                       | Sources                                                                                              |
| <b>Antidepressant-Like Effects</b>             |              |                                                                                               |                               |                                                                                                      |
| <b>Animal Assay (Forced Swim Test)</b>         |              |                                                                                               |                               |                                                                                                      |
|                                                | ↓ Immobility | Garcia et al (31), Autry et al (32), Nosyreva et al (33), Gideons et al (34), Zhou et al (35) | ↓ Immobility<br><br>No Effect | Moryl et al (36), Rogóz et al (37), Reus et al (38)<br><br>Gideons et al (34), Skuza and Rogóz (175) |
| <b>NMDA Blockade</b>                           |              |                                                                                               |                               |                                                                                                      |
| <b>In Vitro Neuronal Culture</b>               |              |                                                                                               |                               |                                                                                                      |
| No Magnesium                                   | ↓ PSC        | Gideons et al (34), Emmett et al (176)                                                        | ↓ PSC                         | Gideons et al (34), Emmett et al (176), Kotermanski et al (177)                                      |
| Magnesium Added                                | ↓ PSC        | Gideons et al (34)                                                                            | No Effect                     | Gideons et al (34), Kotermanski et al (177)                                                          |
| <b>NMDA Trapping Block</b>                     |              |                                                                                               |                               |                                                                                                      |
| <b>In Vitro Neuronal Culture</b>               |              |                                                                                               |                               |                                                                                                      |
|                                                | 86-87%       | Mealing et al (134)                                                                           | 71-76%                        | Mealing et al (134)                                                                                  |
| <b>Second Messenger – eEF2</b>                 |              |                                                                                               |                               |                                                                                                      |
| <b>In Vitro Culture of Hippocampal Neurons</b> |              |                                                                                               |                               |                                                                                                      |
|                                                | ↓ Phos       | Autry et al (32), Nosyreva et al (33), Gideons et al (34)                                     | No Effect                     | Gideons et al (34)                                                                                   |
| <b>Second Messenger - BDNF</b>                 |              |                                                                                               |                               |                                                                                                      |
| <b>In Vitro Culture of Hippocampal Neurons</b> |              |                                                                                               |                               |                                                                                                      |
|                                                | ↑ BDNF       | Autry et al (32), Nosyreva et al (33), Gideons et al (34)                                     | No Effect                     | Gideons et al (34)                                                                                   |
| <b>Second Messenger - BDNF</b>                 |              |                                                                                               |                               |                                                                                                      |
| <b>Animal Studies</b>                          |              |                                                                                               |                               |                                                                                                      |
|                                                | ↑ BDNF       | Garcia et al (31), Zhou et al (35), Becker et al (178), Yang et al (179)                      | ↑ BDNF                        | Reus et al (38) (acute); Reus et al (180)                                                            |

|                                |        |                                                                                            |           |                           |
|--------------------------------|--------|--------------------------------------------------------------------------------------------|-----------|---------------------------|
|                                | ↓ BDNF | Fraga et al (181) (chronic)                                                                | No Effect | Reus et al (38) (chronic) |
| <b>Second Messenger – mTOR</b> |        |                                                                                            |           |                           |
|                                | ↑ mTOR | Li et al (140); Yang et al (179); Yang et al (182); Zhou et al (35); Wesseling et al (183) |           |                           |

BDNF=Brain-Derived Neurotrophic Factor    eEF2=Eukaryotic Elongation Factor 2    mTOR=Mammalian Target of Rapamycin    PSC=Postsynaptic Current    Phos=Phosphorylation

Online Supplemental Figure 1A, 1B

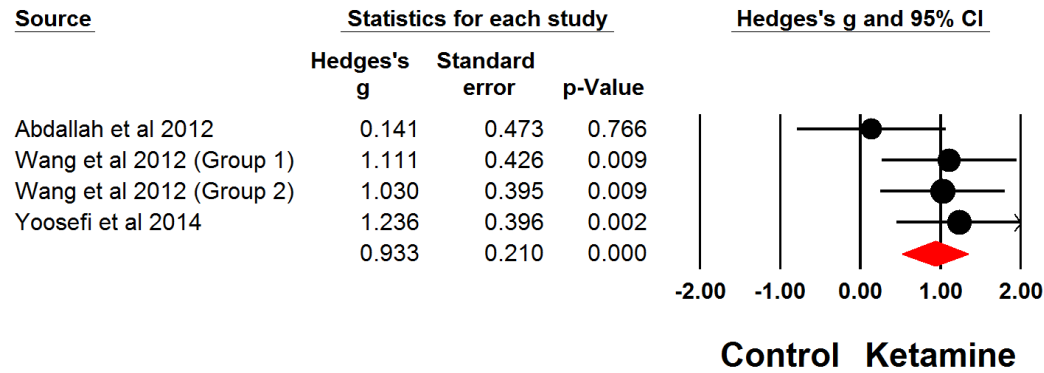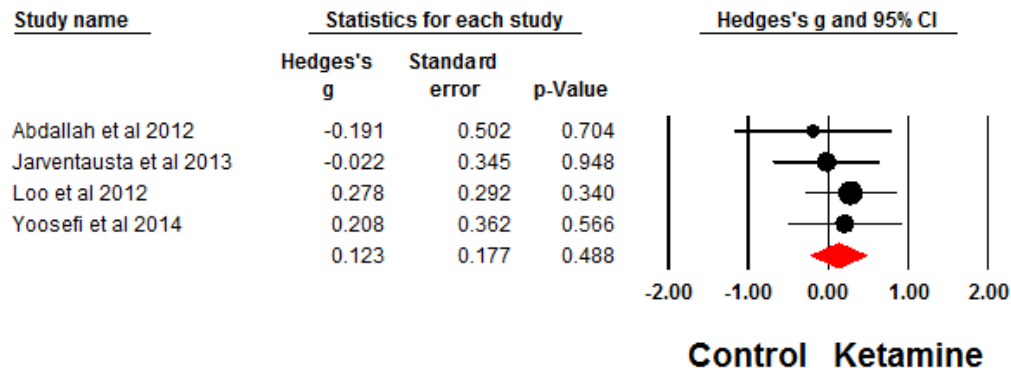

Online Supplemental Figure 2A, 2B

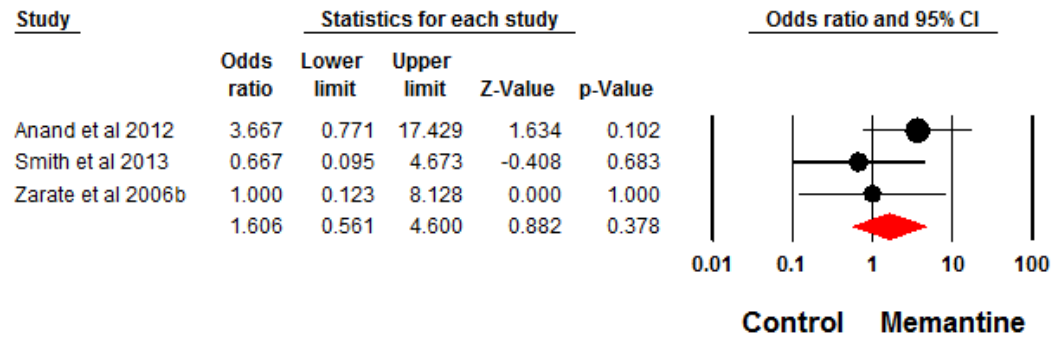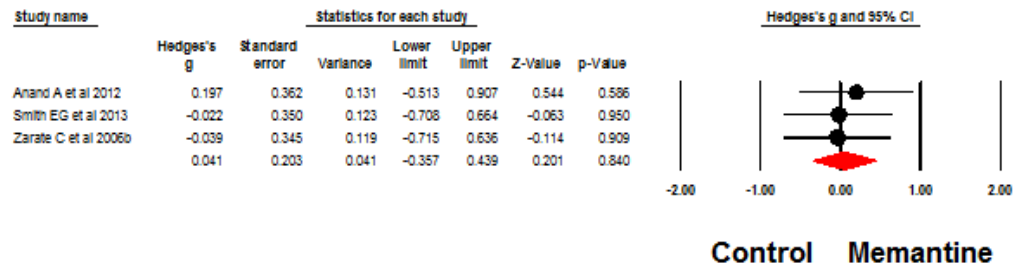

Online Supplemental Figure 3A, 3B

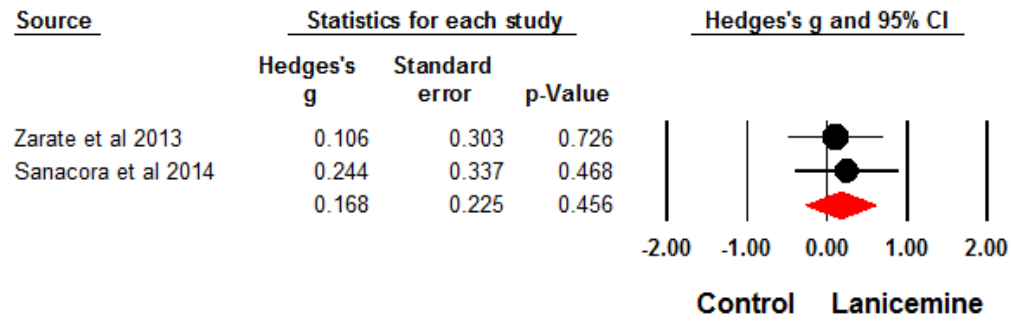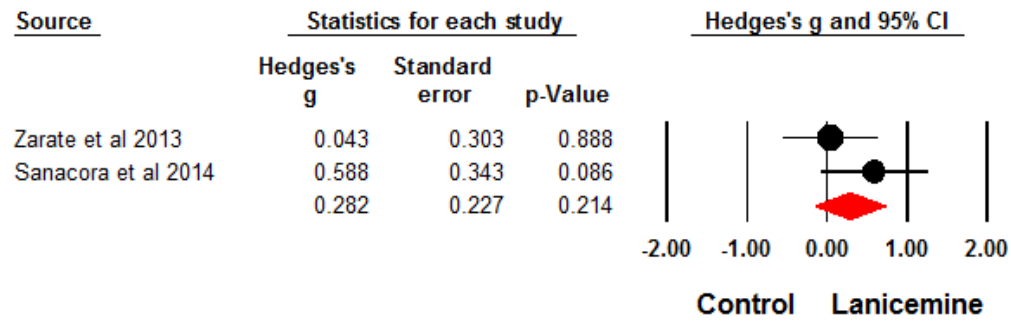

Supplement: appi.ajp.2015.15040465.ds001.pdf [file appi.ajp.2015.15040465.ds001.pdf]
